# Supplementary material
Source: Elsevier journal article supplement (https://www.sciencedirect.com/science/article/pii/S1885585720303352)
Supplement: mmc1 [file S1885585720303352:mmc1.pdf]

## Prognostic value of lung ultrasound in chronic stable ambulatory heart failure patients

## SUPPLEMENTARY DATA

Table 1 of the supplementary data

Univariable Cox regression analysis for the composite endpoint and for all-cause death

|                                        | Composite endpoint <sup>a</sup> |           |       | All-cause death |           |       |
|----------------------------------------|---------------------------------|-----------|-------|-----------------|-----------|-------|
|                                        | HR                              | 95% CI    | P     | HR              | 95% CI    | P     |
| <i>Total B-lines sum</i>               | 1.05                            | 1.03–1.08 | <.001 | 1.06            | 1.04–1.09 | <.001 |
| <i>Age, y</i>                          | 1.05                            | 1.04–1.08 | <.001 | 1.07            | 1.05–1.09 | <.001 |
| <i>Female sex</i>                      | 1.12                            | 0.80–1.58 | .52   | 1.15            | 0.77–1.73 | .49   |
| <i>Ischemic etiology</i>               | 1.83                            | 1.33–2.50 | <.001 | 1.97            | 1.35–2.87 | <.001 |
| <i>HF duration, y<sup>b</sup></i>      | 1.27                            | 1.06–1.54 | .01   | 1.20            | 0.97–1.50 | .10   |
| <i>NYHA class</i>                      | 2.83                            | 2.12–3.78 | <.001 | 2.99            | 2.12–4.21 | <.001 |
| <i>LVEF, %</i>                         | 0.98                            | 0.97–0.99 | .002  | 0.98            | 0.97–0.99 | .02   |
| <i>Diabetes</i>                        | 1.75                            | 1.28–2.39 | <.001 | 1.67            | 1.15–2.43 | .007  |
| <i>Hypertension</i>                    | 1.75                            | 1.25–2.46 | .001  | 1.79            | 1.19–2.69 | .005  |
| <i>COPD</i>                            | 1.31                            | 0.83–2.08 | .25   | 1.28            | 0.74–2.21 | .37   |
| <i>Atrial fibrillation/flutter</i>     | 1.72                            | 1.21–2.43 | .002  | 1.57            | 1.04–2.39 | .03   |
| <i>Anemia<sup>c</sup></i>              | 2.17                            | 1.58–2.98 | <.001 | 2.82            | 1.94–4.10 | <.001 |
| <i>Renal insufficiency<sup>d</sup></i> | 2.87                            | 2.05–4.02 | <.001 | 2.66            | 1.78–3.97 | <.001 |
| <i>BMI, kg/m<sup>2</sup></i>           | 0.97                            | 0.94–1.00 | .09   | 0.95            | 0.92–1.00 | .03   |
| <i>NT-proBNP, ng/L<sup>e</sup></i>     | 2.10                            | 1.80–2.45 | <.001 | 2.25            | 1.87–2.72 | <.001 |
| <i>Treatments</i>                      |                                 |           |       |                 |           |       |
| ACEI or ARB                            | 0.37                            | 0.26–0.51 | <.001 | 0.38            | 0.26–0.56 | <.001 |
| Beta-blocker                           | 0.68                            | 0.42–1.16 | .13   | 0.51            | 0.30–0.86 | .01   |

|                      |      |           |       |      |           |       |
|----------------------|------|-----------|-------|------|-----------|-------|
| MRA                  | 1.20 | 0.87–1.66 | .26   | 1.20 | 1.15–1.68 | 0.79  |
| Sacubitril/valsartan | 0.94 | 0.30–2.96 | .92   | 0.43 | 0.06–3.06 | .40   |
| Loop diuretic        | 2.22 | 1.49–3.31 | <.001 | 2.04 | 1.28–3.26 | .003  |
| Digoxine             | 1.30 | 0.89–1.89 | .18   | 1.00 | 0.62–1.61 | .99   |
| Ivabradine           | 0.84 | 0.53–1.31 | .43   | 0.86 | 0.51–1.46 | .58   |
| Hydralazine          | 2.79 | 1.96–3.96 | <.001 | 3.40 | 2.28–5.06 | <.001 |
| Nitrates             | 2.53 | 1.84–3.49 | <.001 | 2.58 | 1.77–3.77 | <.001 |
| CRT                  | 1.14 | 0.76–1.70 | .54   | 1.37 | 0.86–2.16 | .18   |
| IDC                  | 0.93 | 0.64–1.34 | .69   | 0.83 | 0.53–1.31 | .42   |

ACEI, angiotensin converting enzyme inhibitor; ARB, angiotensin II receptor blocker; BMI, body mass index; COPD, chronic obstructive pulmonary disease; CRT, cardiac resynchronization therapy; HF, heart failure; ICD, implantable cardiac defibrillator; LVEF, left ventricular ejection fraction; MRA, mineralocorticoid receptor antagonist; NYHA, New York Heart Association; NT-proBNP, N-terminal pro-brain natriuretic peptide.

<sup>a</sup> Composite of all-cause death or HF hospitalization.

<sup>b</sup> Log-transformed and in months.

<sup>c</sup> According to WHO criteria (< 13 g/dL in men and < 12 g/dL in women).

<sup>d</sup> Estimated glomerular filtration rate (Chronic Kidney Disease Epidemiology Collaboration equation) <60 mL/min per 1.73 m<sup>2</sup>.

<sup>e</sup> Log-transformed and for 1 standard deviation.

Table 2 of the supplementary data

Study design, LUS-specific components and results

|                              |                                                                                                                                                                                                                                                                                                                                                                                                                                                                                                                                                                                                                                                                                                                                                                                                                        |
|------------------------------|------------------------------------------------------------------------------------------------------------------------------------------------------------------------------------------------------------------------------------------------------------------------------------------------------------------------------------------------------------------------------------------------------------------------------------------------------------------------------------------------------------------------------------------------------------------------------------------------------------------------------------------------------------------------------------------------------------------------------------------------------------------------------------------------------------------------|
| <i>Patients</i>              | <ul style="list-style-type: none"> <li>• Heart failure clinic</li> <li>• Ambulatory stable HF patients</li> <li>• Excluded patients: pulmonary fibrosis or radiological diffuse pleural fibrosis</li> </ul>                                                                                                                                                                                                                                                                                                                                                                                                                                                                                                                                                                                                            |
| <i>LUS image acquisition</i> | <ul style="list-style-type: none"> <li>• Pocket device (V-scan simple model with a single sector probe, General Electric)</li> <li>• Phased array transducer, perpendicular to the ribs and an imaging depth of 14 cm</li> <li>• Patient in a supine position</li> <li>• Protocol: 8 areas</li> </ul>                                                                                                                                                                                                                                                                                                                                                                                                                                                                                                                  |
| <i>Lus image analysis</i>    | <ul style="list-style-type: none"> <li>• Off-line analysis</li> <li>• Sonographer and reader blinded to clinical data, NT-proBNP and echocardiogram</li> <li>• Number of B-lines in each thoracic area</li> <li>• The sum of B-lines across all lung areas and the quartiles of such addition were used for the analyses</li> </ul>                                                                                                                                                                                                                                                                                                                                                                                                                                                                                    |
| <i>Data analyses</i>         | <ul style="list-style-type: none"> <li>• Main clinical outcomes: composite endpoint of all-cause death or HF hospitalization and mortality from any cause</li> <li>• Follow-up: mean <math>31 \pm 7</math> mo</li> <li>• Mean number of B-lines: <math>5 \pm 6</math></li> <li>• Q1, 0; Q2, 1-3; Q3, 4-7; Q4, <math>\geq 8</math></li> <li>• Survival curves: having <math>\geq 8</math> B-lines (Q4) doubled the risk of experiencing the composite endpoint (<math>P &lt; .001</math>) and increased by 2.6-fold the risk of death from any cause (<math>P &lt; .001</math>)</li> <li>• Multivariable analysis: sum of B-lines across all lung areas remained as an independent prognostic factor of the composite endpoint and all-cause death, independently of the inclusion of NT-proBNP in the model</li> </ul> |

LUS, lung ultrasound; NT-proBNP, N-terminal pro-brain natriuretic peptide.

## FIGURES OF THE SUPPLEMENTARY DATA

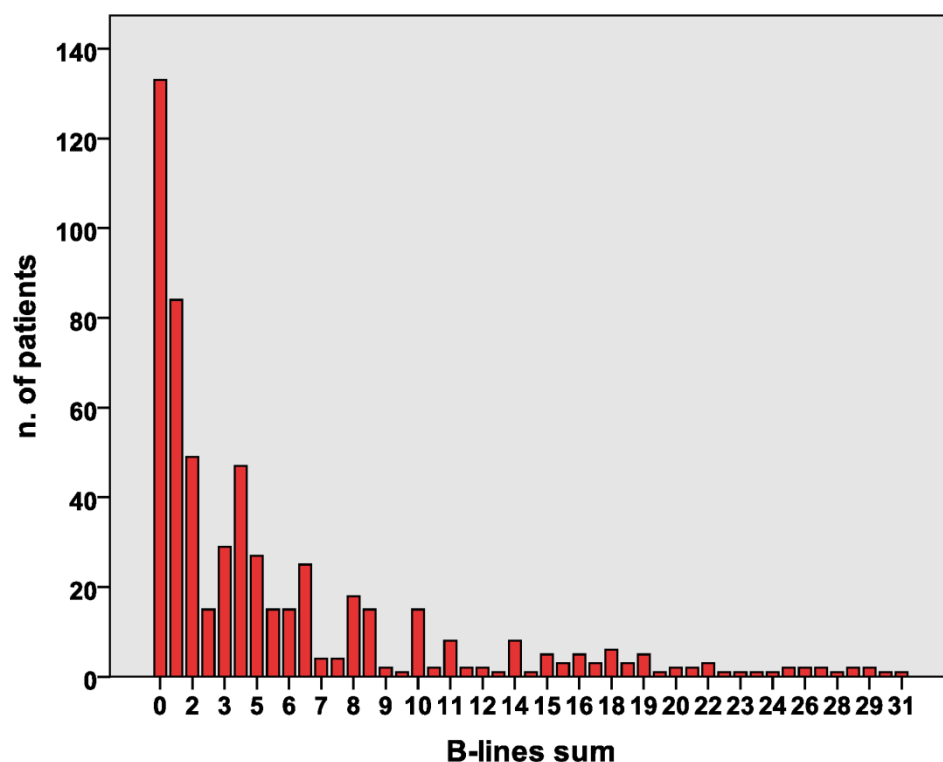

**Figure 1 of the supplementary data.** Distribution of sum of B-lines across all lung areas per patient in the total cohort. Around one fourth of the patients had 0 B-lines.

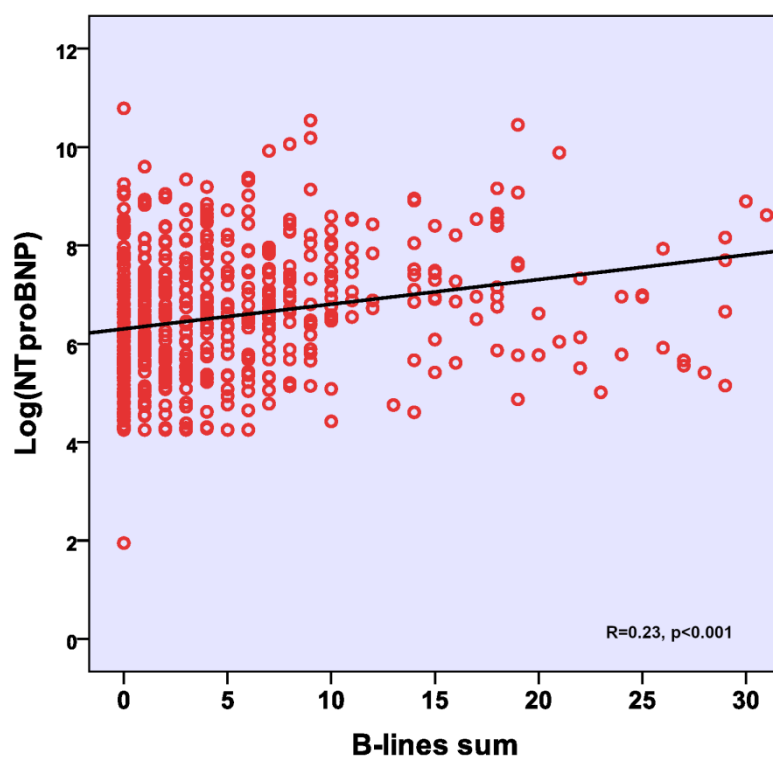

**Figure 2 of the supplementary data.** Scatter-plot representing the sum of B-lines (X axis) and logNTproBNP (Y axis). A statistically significant but rather modest correlation was found.

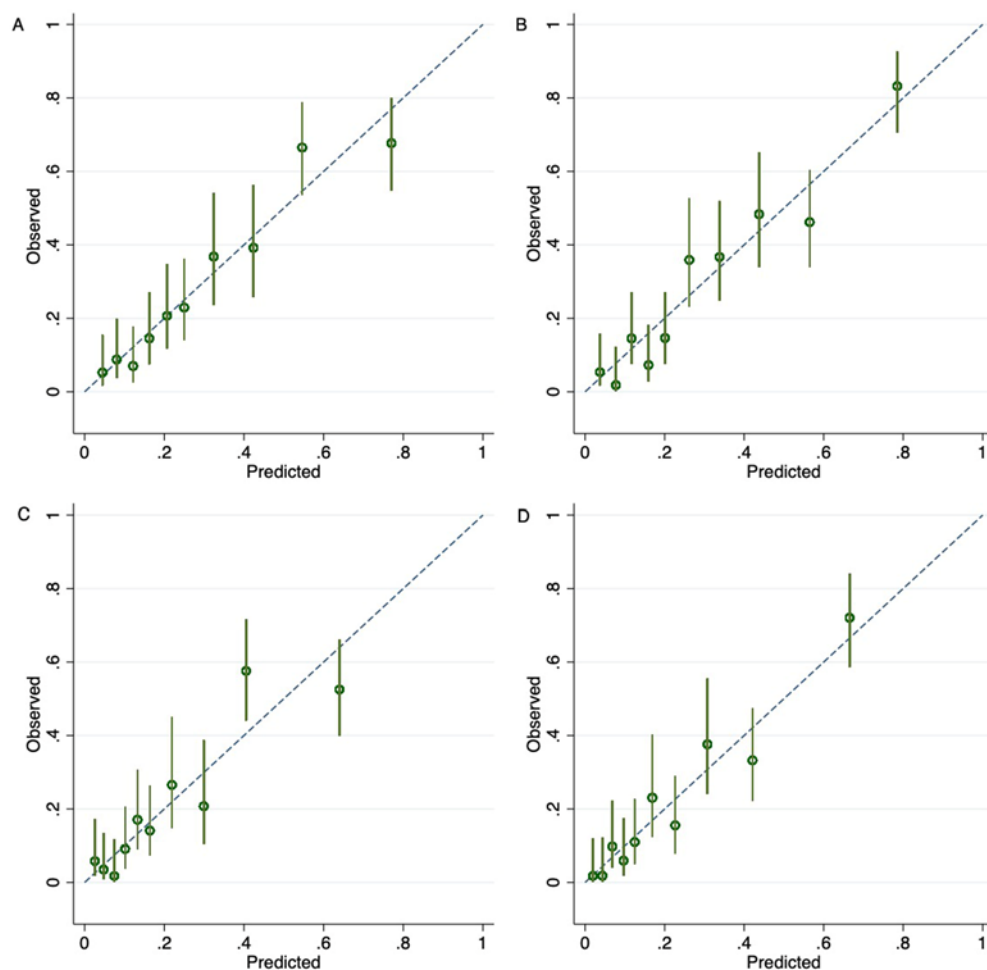

**Figure 3 of the supplementary data.** Calibration plots for the composite endpoint in predictive models with and without NT-proBNP (A and B) and for all-cause death in both models (C and D, respectively). Calibration was assessed by plotting the predicted probability of the clinical endpoint against the observed frequency.
